# Supplementary material
Source: HighWire-hosted journal article supplement (https://genome.cshlp.org/content/suppl/2004/06/17/14.7.1268)

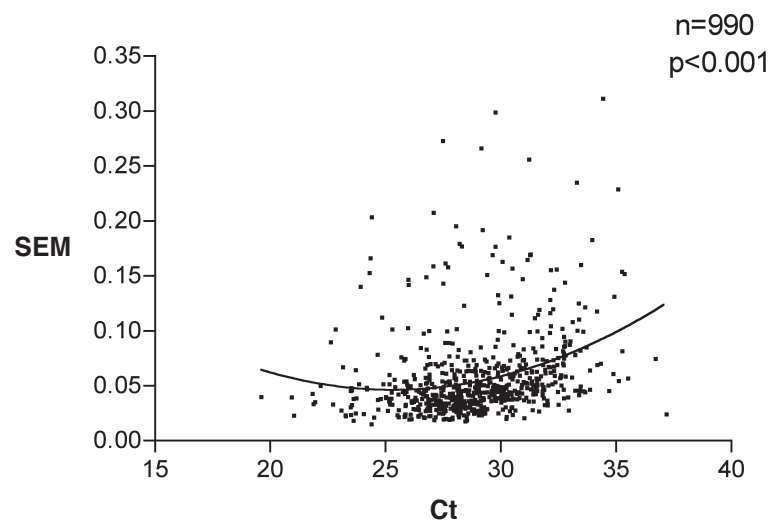

Supplement: Lyle_Supp_Figure_2.pdf [file Lyle_Supp_Figure_2.pdf]
